# Supplementary material
Source: Springer Nature journal article supplement (https://mijn.bsl.nl/resource/supplementary/13047_2009_107_MOESM1_ESM.pdf/7109796)

Gel Pad

Skin

AbdH

Dorso-plantar  
thickness

Medio-lateral  
width

G  
P R  
5.0 12.0

PHILIPS

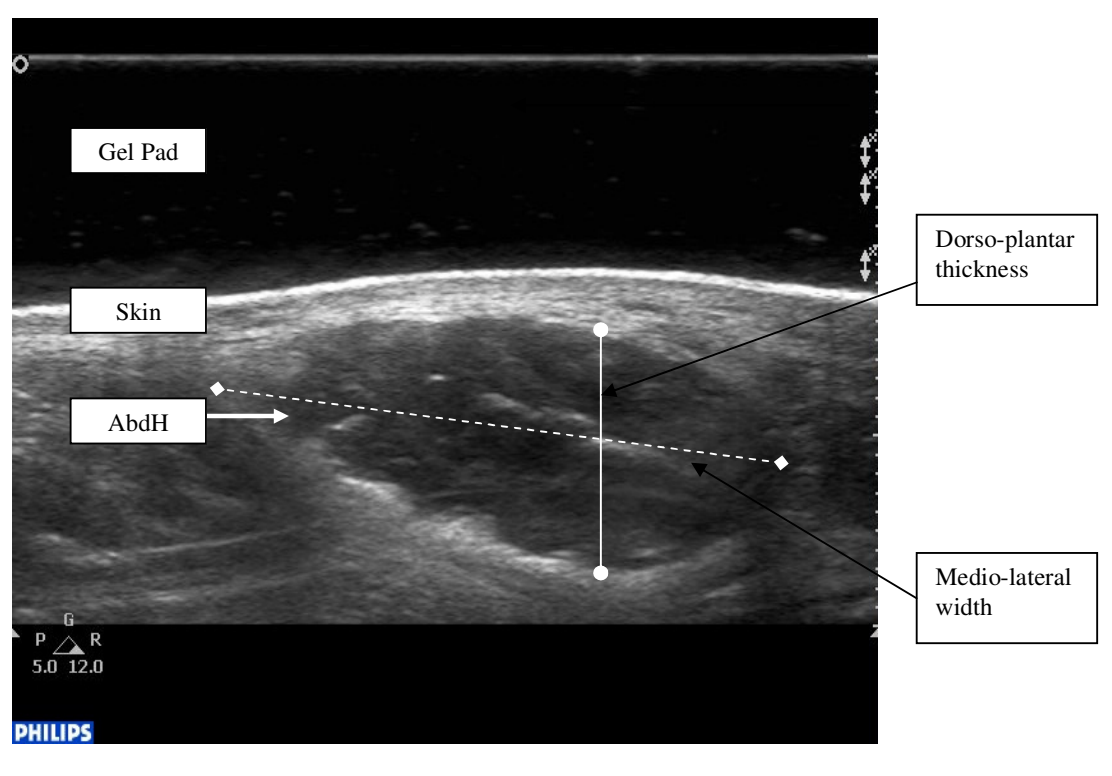

Supplement: MOESM1 [file 7109796]
